# Supplementary figures and images for: A new organometallic heteropolytungstate related to [Sb2W22O74(OH)2]12–: synthesis and structural characterisation of the bis-{Ru(p-cymene)}2+-containing anion [Sb2W20O70{Ru(p-cymene)}2]10–
Source: Royal Society of Chemistry journal article supplement (doi:10.1039/b510300b), 2005-01-01

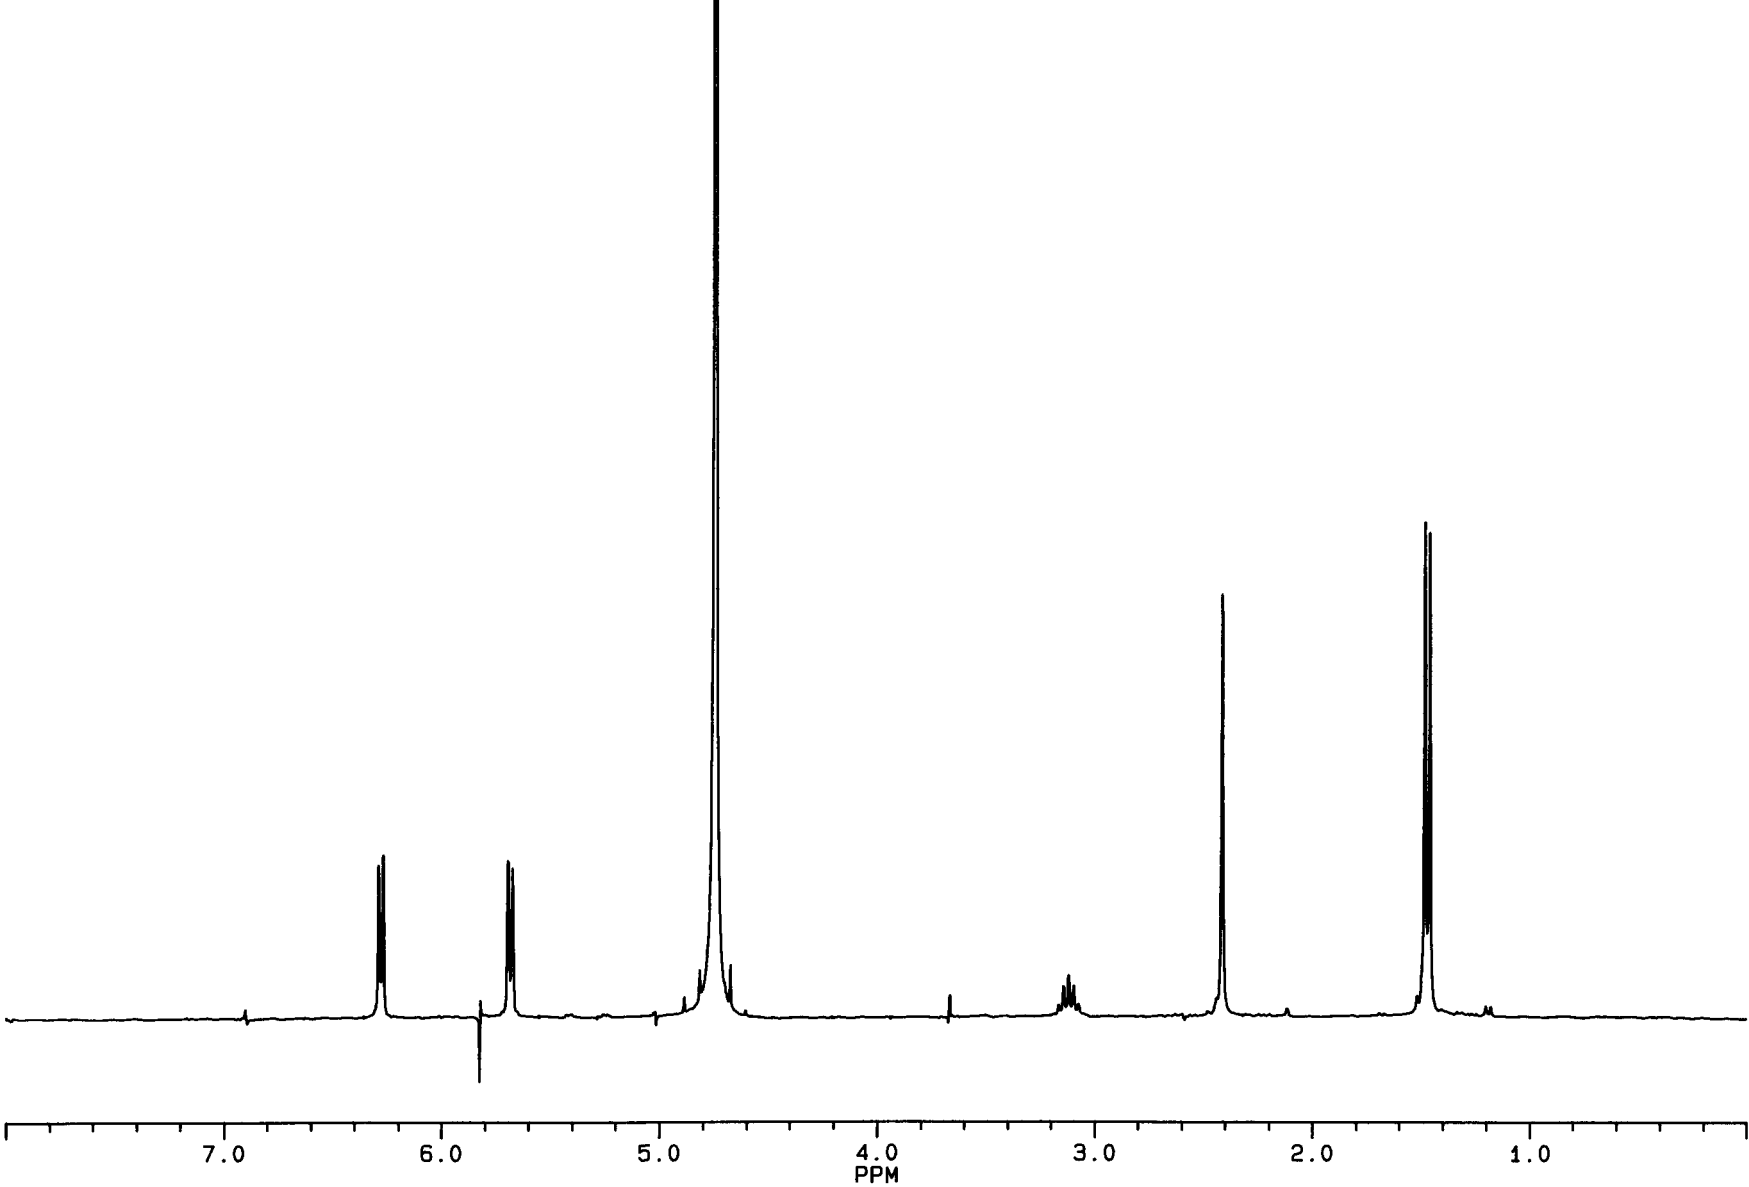

(Sb2W20O70(RU(P-CYM))2)10- : crystals in D2O

98.5181  
96.8073

83.8984

75.8731

30.9255

22.4803

16.9124

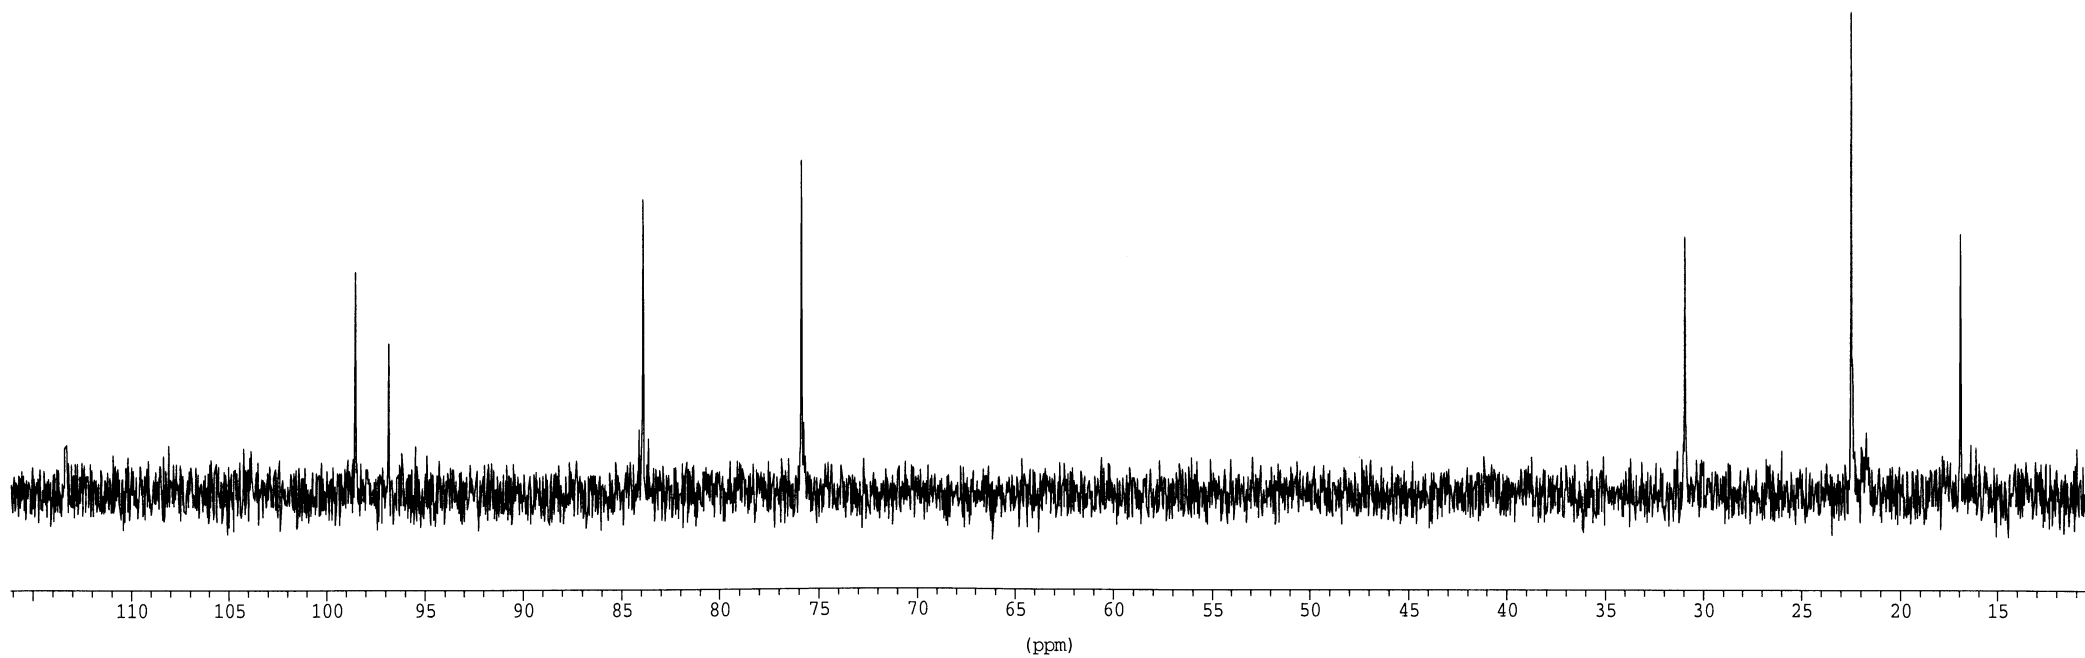

Supplement: b510300b.pdf [file b510300b.pdf]
